# Supplementary material for: Association of Longitudinal Changes in Cerebrospinal Fluid Total Tau and Phosphorylated Tau 181 and Brain Atrophy With Disease Progression in Patients With Alzheimer Disease
Source: PubMed Central journal article supplement (PMC6991202; doi:10.1001/jamanetworkopen.2019.17126), 2019-12-11
Supplement: jamanetwopen-2-e1917126-s001.pdf [file jamanetwopen-2-e1917126-s001.pdf]

## Supplementary Online Content

Llibre-Guerra JJ, Li Y, Schindler SE, et al. Association of longitudinal changes in cerebrospinal fluid total tau and phosphorylated tau 181 and brain atrophy with disease progression in patients with Alzheimer disease. *JAMA Netw Open*. 2019;2(12):e1917126.  
doi:10.1001/jamanetworkopen.2019.17126

**eTable 1.** Number of Participants With Longitudinal CSF Biomarkers and MRI Assessments

**eTable 2.** Associations Between CSF tTau and MRI Regions by Disease Stage (Asymptomatic vs Symptomatic)

**eTable 3.** Associations Between CSF pTau181 and MRI Regions by Disease Stage (Asymptomatic vs Symptomatic)

This supplementary material has been provided by the authors to give readers additional information about their work.

**eTable 1. Number of Participants With Longitudinal CSF Biomarkers and MRI Assessments**

| # of visits | CSF biomarker |     |       | MRI |     |       |
|-------------|---------------|-----|-------|-----|-----|-------|
|             | NC            | MC  | Total | NC  | MC  | Total |
| 1           | 90            | 130 | 220   | 88  | 112 | 200   |
| 2           | 38            | 69  | 107   | 63  | 96  | 159   |
| 3           | 12            | 25  | 37    | 18  | 47  | 65    |
| 4           | 4             | 5   | 9     | 4   | 7   | 11    |
| 5           | 1             | 5   | 6     | 3   | 5   | 8     |
| 6           | 0             | 1   | 1     | 1   | 3   | 4     |
| Total       | 145           | 235 | 380   | 177 | 270 | 447   |

NC=non-carriers, MC=mutation carriers

**eTable 2. Associations Between CSF tTau and MRI Regions by Disease Stage (Asymptomatic vs Symptomatic)**

| tTau            | Asymptomatic MC (aMC) |         | Symptomatic MC (sMC) |         | p value for difference in r between aMC and sMC |
|-----------------|-----------------------|---------|----------------------|---------|-------------------------------------------------|
|                 | r                     | p value | r                    | p value |                                                 |
| Hippocampus     | -0.25                 | 0.03    | 0.53                 | 0.04    | <0.0001                                         |
| Parahippocampus | -0.43                 | < 0.001 | 0.34                 | 0.11    | <0.0001                                         |
| Post.Cing       | -0.15                 | 0.26    | 0.14                 | 0.57    | 0.16                                            |
| Sup. Temp       | -0.45                 | <0.001  | 0.30                 | 0.13    | 0.0001                                          |
| Precuneus       | -0.30                 | 0.03    | 0.26                 | 0.26    | 0.005                                           |
| Supramarginal   | -0.22                 | 0.17    | 0.15                 | 0.43    | 0.07                                            |
| Entorhinal      | -0.35                 | 0.15    | -0.09                | 0.66    | 0.19                                            |
| Orbit Frontal   | -0.01                 | 0.97    | 0.24                 | 0.18    | 0.22                                            |
| Sup. Frontal    | 0.04                  | 0.81    | 0.14                 | 0.48    | 0.63                                            |
| C.Mid.Front     | -0.13                 | 0.4     | 0.03                 | 0.89    | 0.44                                            |
| R.Mid.Frontal   | 0.12                  | 0.47    | -0.10                | 0.62    | 0.29                                            |
| Third.Vent      | 0.24                  | 0.04    | -0.62                | <0.001  | <0.0001                                         |

**eTable 3. Associations Between CSF pTau181 and MRI Regions by Disease Stage (Asymptomatic vs Symptomatic)**

| pTau181         | Asymptomatic MC (aMC) |         | Symptomatic MC (sMC) |         | p value for difference in r between aMC and sMC |
|-----------------|-----------------------|---------|----------------------|---------|-------------------------------------------------|
|                 | r                     | p value | r                    | p value |                                                 |
| Hippocampus     | -0.23                 | 0.05    | 0.51                 | 0.01    | <0.0001                                         |
| Parahippocampus | -0.31                 | 0.005   | 0.27                 | 0.12    | <0.0001                                         |
| Post.Cing       | 0.01                  | 0.92    | 0.01                 | 0.96    | 1                                               |
| Sup. Temp       | -0.30                 | 0.01    | 0.46                 | 0.01    | 0.0001                                          |
| Precuneus       | 0.05                  | 0.74    | 0.44                 | 0.02    | 0.04                                            |
| Supramarginal   | -0.04                 | 0.75    | 0.29                 | 0.09    | 0.1                                             |
| Entorhinal      | -0.11                 | 0.39    | -0.18                | 0.36    | 0.73                                            |
| Orbit Frontal   | 0.10                  | 0.44    | 0.43                 | 0.01    | 0.08                                            |
| Sup. Frontal    | 0.16                  | 0.24    | 0.44                 | 0.01    | 0.13                                            |
| C.Mid.Front     | 0.09                  | 0.46    | 0.29                 | 0.10    | 0.32                                            |
| R.Mid.Frontal   | 0.20                  | 0.14    | 0.22                 | 0.26    | 0.92                                            |
| Third.Vent      | 0.07                  | 0.58    | -0.64                | <0.001  | <0.0001                                         |
